# Supplementary material for: Nano bowl-like cobalt–cobalt molybdenum carbide coated by N,P co-doped carbon as an advanced bifunctional oxygen electrocatalyst for rechargeable Zn–air batteries
Source: Royal Society of Chemistry journal article supplement (doi:10.1039/d3dt00632h), 2023-01-01
Supplement: d3dt00632h1.pdf [file d3dt00632h1.pdf]

## Electronic Supplementary Information

### **Nano Bowl-like Cobalt-Cobalt Molybdenum Carbide Coated by N, P co-doped Carbon as Advanced Bifunctional Oxygen Electrocatalyst for Rechargeable Zn-air battery**

Yanqiang Li,<sup>\*,a</sup> Huicheng Wang,<sup>a</sup> Hai An,<sup>a</sup> Xuan Liu,<sup>b</sup> Siru Chen<sup>c</sup> Xue-Zhi Song<sup>\*,</sup>

<sup>b</sup>

<sup>a</sup> School of Materials Science and Engineering, North China University of Water Resources and Electric Power, Zhengzhou, 450045, China E-mail: lyqncwu@126.com

<sup>b</sup> State Key Laboratory of Fine Chemicals, School of Chemical Engineering, Dalian University of Technology, Panjin Campus, Panjin 124221, China

E-mail: songxz@dlut.edu.cn

<sup>c</sup> School of Material and Chemical Engineering, Center for Advanced Materials Research, Zhongyuan University of Technology, Zhengzhou, 450007, China

## **1. Experimental Section**

### **1.1 Synthesis of CoMo-MOF and Co-MOF**

The CoMo-MOF was synthesized according to the following procedure: 4 mmol of 2-methylimidazole was dissolved into 40 mL of N, N-dimethylformamide, and 1 mmol of cobalt acetate and 300 mg of phosphomolybdic acid was dissolved into another 40 mL of N, N-dimethylformamide. Then the two solution was mixed and stirred at room temperature for 24 h. Afterword, the precipitate was collected via centrifugation and washed with ethanol for three times. For comparison, Co-MOF was synthesized using the similar procedure without adding phosphomolybdic acid.

### **1.2 Synthesis of Co-Co<sub>6</sub>Mo<sub>6</sub>C<sub>2</sub>@NPC and Co@NC**

Co-Co<sub>6</sub>Mo<sub>6</sub>C<sub>2</sub>@NPC and Co@NC were prepared by directly annealing the CoMo-MOF and Co-MOF in N<sub>2</sub> atmosphere at 800 °C for two hours.

### **1.3 Structure characterization**

The crystal phases of the synthesized materials were examined using X-ray diffraction (XRD) on a Lab XRD-7000s System using a Cu K $\alpha$  radiation ( $\lambda=0.1542$  nm). The micro-morphology and element analysis were conducted with a Nova Nano SEM 450 scanning electron microscope (SEM) and transmission electron microscopy (TEM, JEOL-2100F). The chemical composition of catalysts was measured using an X-ray photoelectron spectrometer (XPS) equipped with Al K $\alpha$  radiation.

### **1.4 Electrochemical measurements**

Electrochemical measurements were conducted using a conventional three-electrode electrochemical set-up. Ag/AgCl (saturated) electrode and a graphite rod were used as

reference and counter electrodes, respectively. Catalyst loaded glass carbon electrode is used as the working electrode. The catalyst ink was prepared by dispersing 4 mg of the catalyst into a mixture solution of 960  $\mu\text{L}$  isopropanol and 40  $\mu\text{L}$  Nafion under sonication. Then, 20  $\mu\text{L}$  of the catalyst ink was dipped onto working electrode for measurement.

The Zn-air batteries was fabricated using catalyst loaded carbon paper ( $1 \text{ mg cm}^{-2}$ ) as the air cathode and polished Zn foil as anode. The electrolyte is 6.0 M KOH solution containing 0.2 M zinc acetate. The data were collected using a Land-CT2001A testing system.

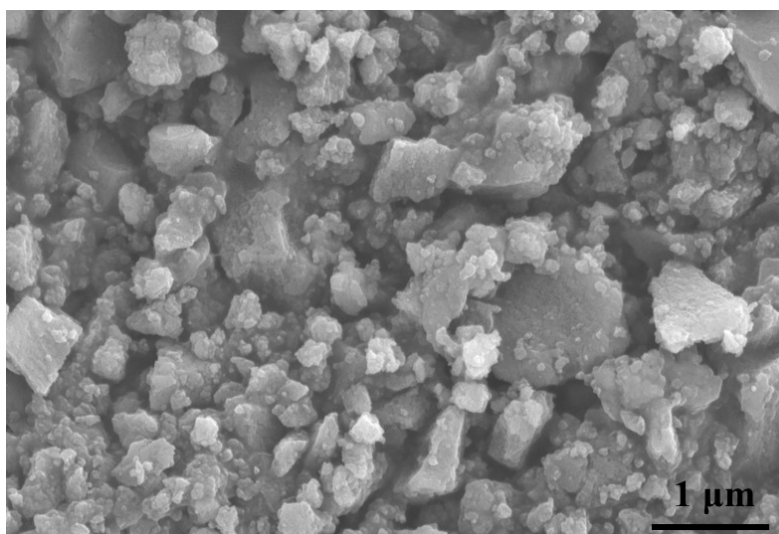

**Figure S1** SEM image of Co-MOF.

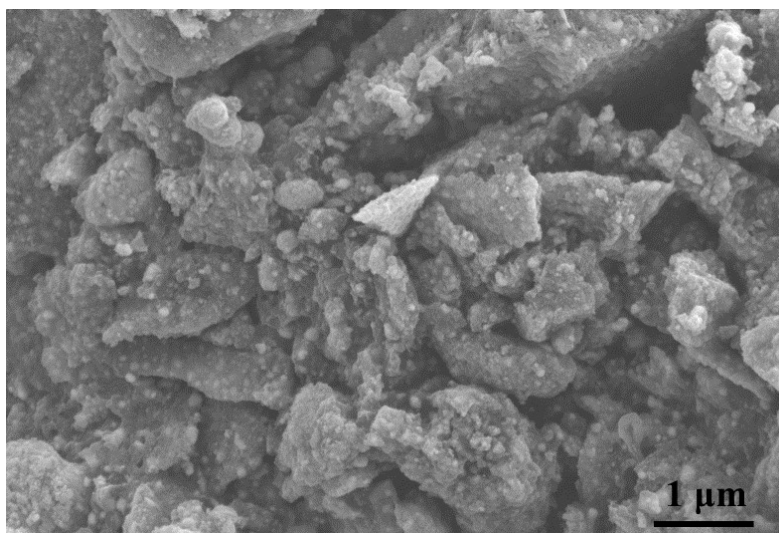

Figure S2 SEM image of Co@NC.

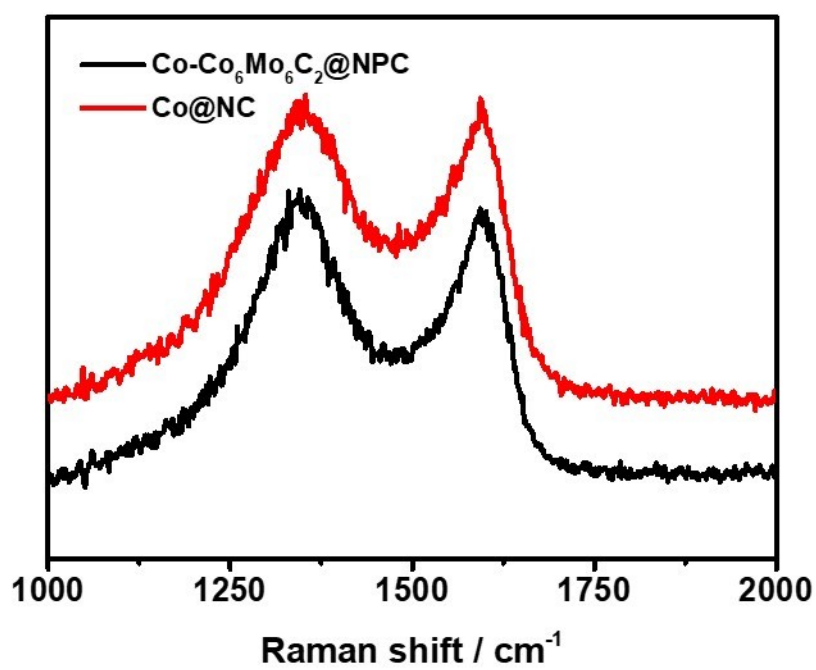

Figure S3 Raman spectra of Co-Co<sub>6</sub>Mo<sub>6</sub>C<sub>2</sub>@NPC and Co@NC.

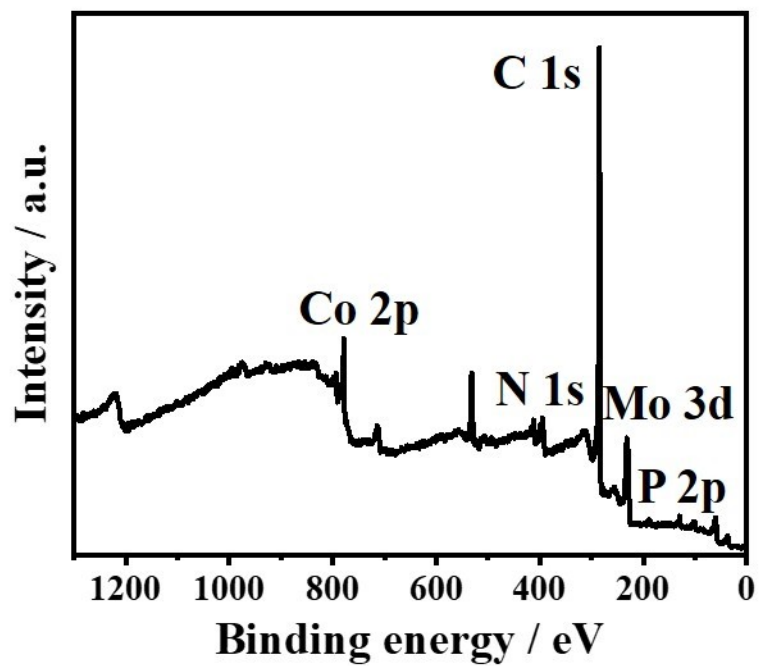

Figure S4 XPS survey spectra of Co-Co<sub>6</sub>Mo<sub>6</sub>C<sub>2</sub>@NPC.

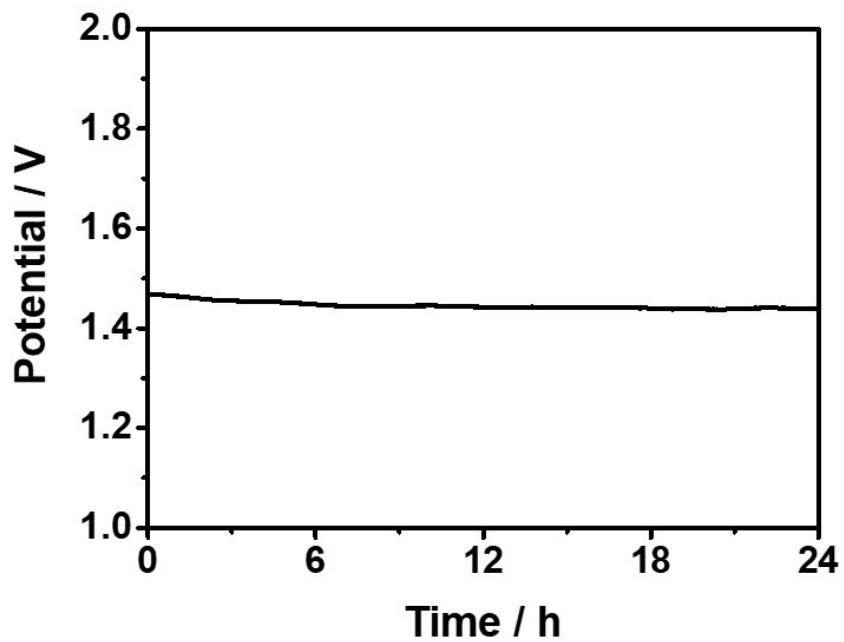

Figure S5 Stability of Co-Co<sub>6</sub>Mo<sub>6</sub>C<sub>2</sub>@NPC for OER.

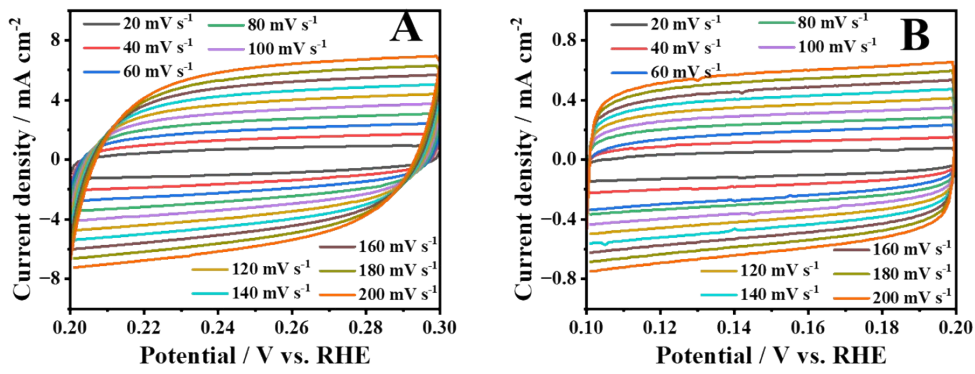

**Figure S6** CV curves of Co-Co<sub>6</sub>Mo<sub>6</sub>C<sub>2</sub>@NPC (A) and Co@NC (B).

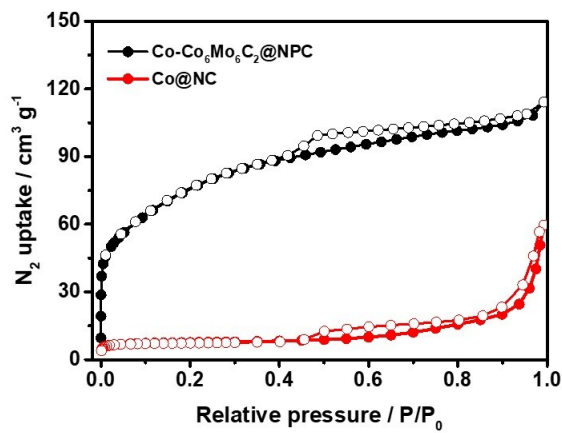

**Figure S7** N<sub>2</sub> adsorption-desorption curves of Co-Co<sub>6</sub>Mo<sub>6</sub>C<sub>2</sub>@NPC and Co@NC.

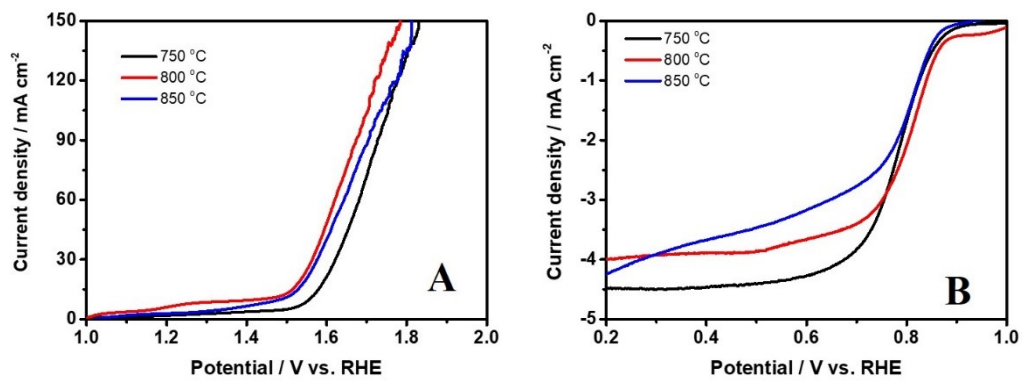

**Figure S8** LSV curves of Co-Co<sub>6</sub>Mo<sub>6</sub>C<sub>2</sub>@NPC for OER (A) and ORR (B) obtained at different temperatures.
